# Supplementary material for: 0.9% saline versus Plasma-Lyte as initial fluid in children with diabetic ketoacidosis (SPinK trial): a double-blind randomized controlled trial
Source: Springer Nature journal article supplement (doi:10.1186/s13054-019-2683-3), 2020-01-02

# Survival: HR (95% CI, p-value)

| Groups      | PlasmaLyte | -                         |
|-------------|------------|---------------------------|
|             | Saline     | 1.72 (0.83-3.57, p=0.146) |
| NewonsetDKA | No         | -                         |
|             | Yes        | 0.65 (0.31-1.37, p=0.254) |
| SeverityDKA | Mild-Mod   | -                         |
|             | Severe     | 1.22 (0.49-3.02, p=0.671) |

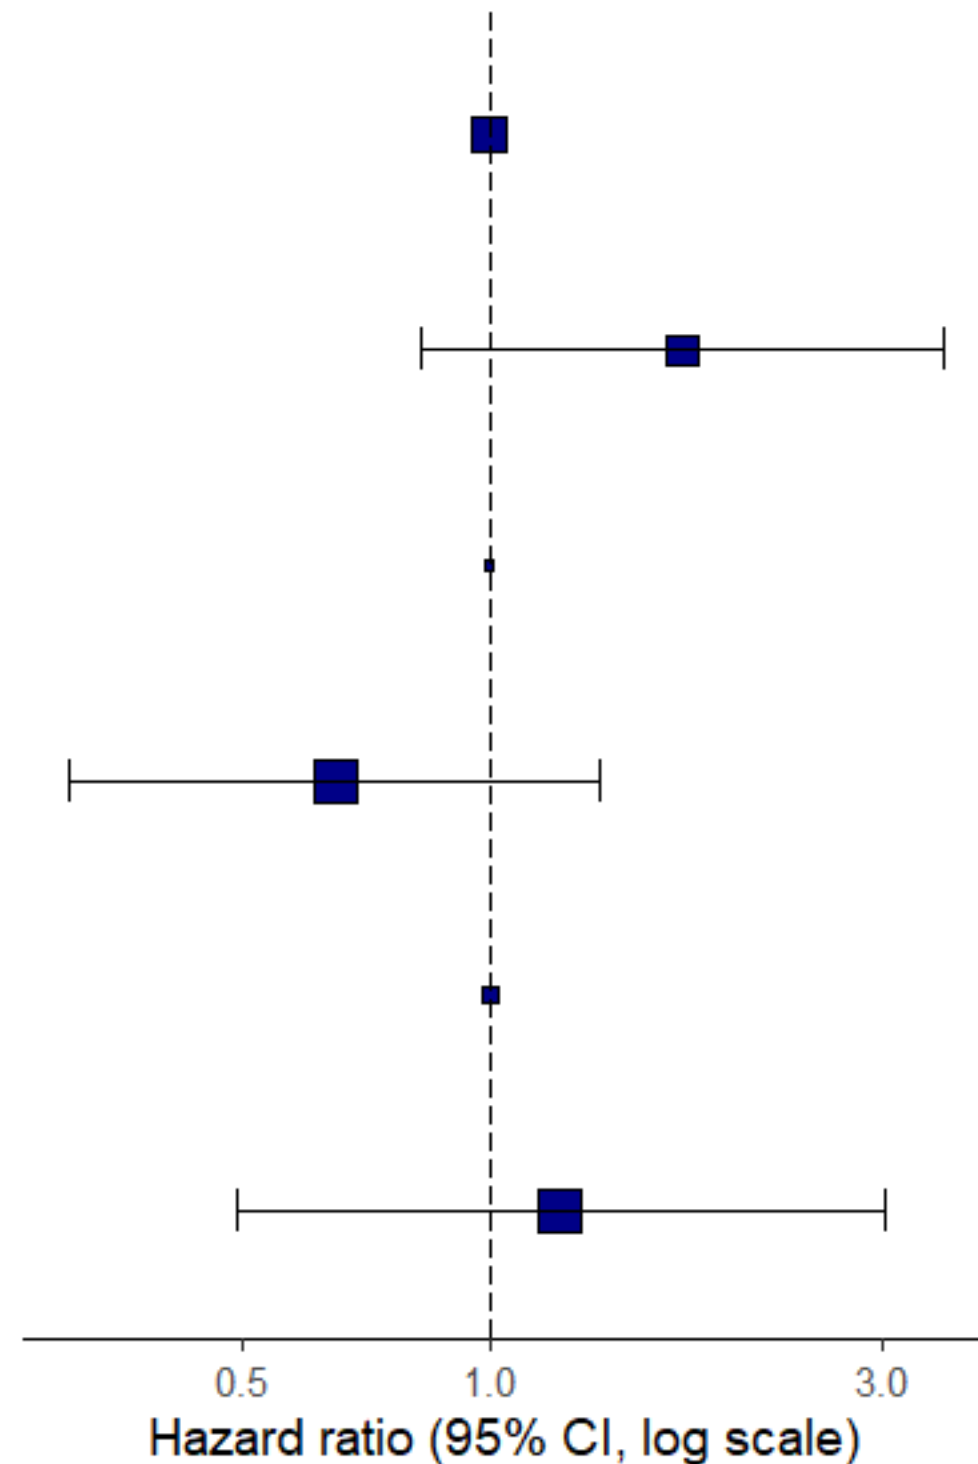

Supplement: MOESM3 [file 17611478]
