# Supplementary material for: 0.9% saline versus Plasma-Lyte as initial fluid in children with diabetic ketoacidosis (SPinK trial): a double-blind randomized controlled trial
Source: Springer Nature journal article supplement (doi:10.1186/s13054-019-2683-3), 2020-01-02

# Survival Functions

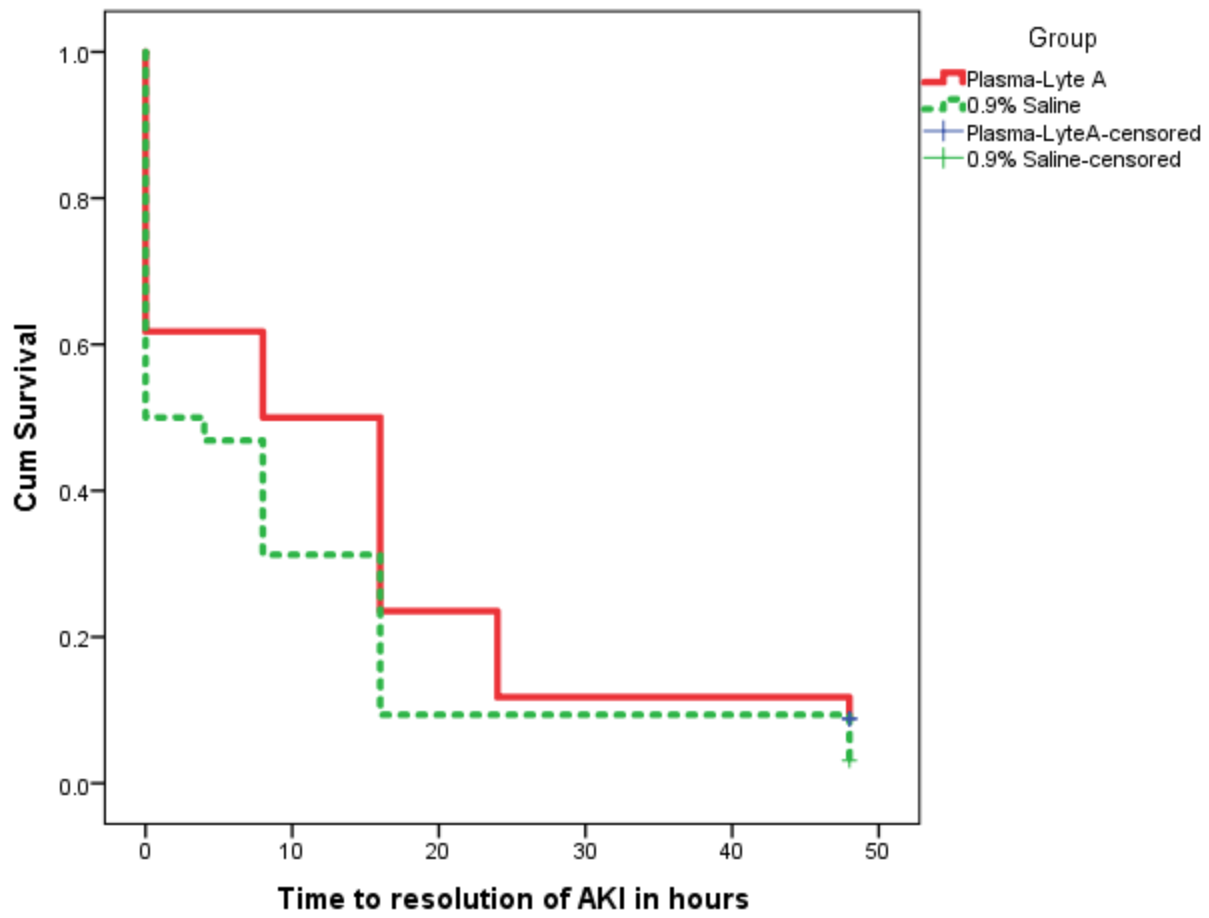

Supplement: MOESM4 [file 17611478]
