# Supplementary material for: 0.9% saline versus Plasma-Lyte as initial fluid in children with diabetic ketoacidosis (SPinK trial): a double-blind randomized controlled trial
Source: Springer Nature journal article supplement (doi:10.1186/s13054-019-2683-3), 2020-01-02
Supplement: MOESM6 [file 17611478]

Serum Chloride

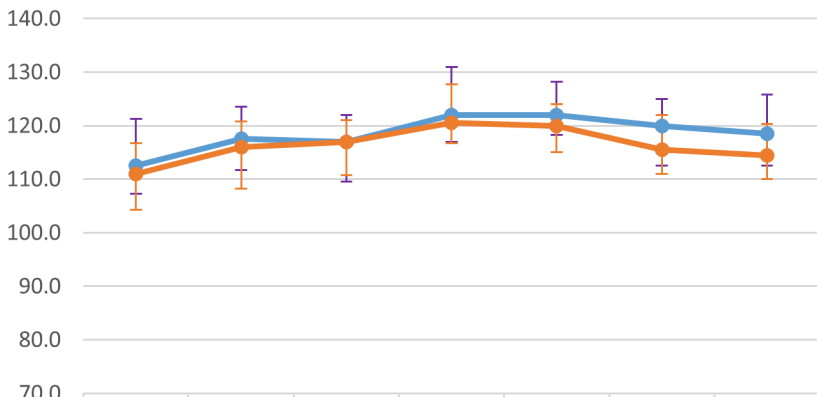

|             |       |       |       |       |       |       |       |
|-------------|-------|-------|-------|-------|-------|-------|-------|
| Plasm-Lyte  | 112.5 | 117.5 | 117.0 | 122.0 | 122.0 | 120.0 | 118.5 |
| 0.9% Saline | 111.0 | 116.0 | 117.0 | 120.5 | 120.0 | 115.5 | 114.5 |

Corrected sodium

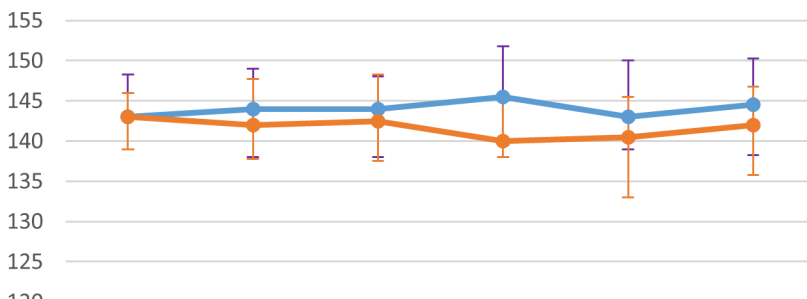

|             |       |       |       |       |       |       |
|-------------|-------|-------|-------|-------|-------|-------|
| Plasma-Lyte | 143   | 144   | 144   | 146   | 143   | 145   |
| 0.9% Saline | 143.0 | 142.0 | 142.5 | 140.0 | 140.5 | 142.0 |

Effective osmolality

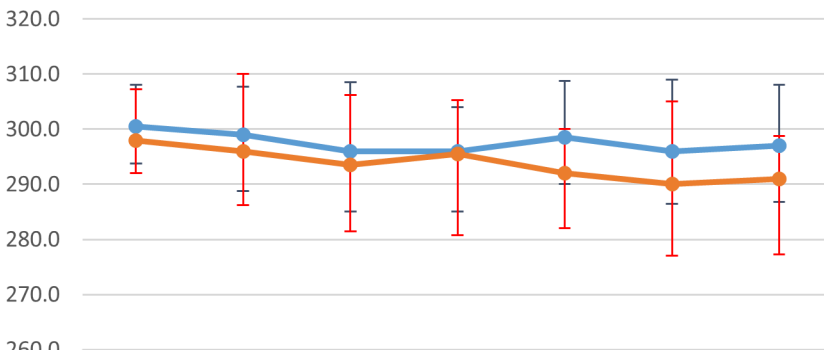

|             |       |       |       |       |       |       |       |
|-------------|-------|-------|-------|-------|-------|-------|-------|
| Plasma-Lyte | 300.5 | 299.0 | 296.0 | 296.0 | 298.5 | 296.0 | 297.0 |
| 0.9% Saline | 298.0 | 296.0 | 293.5 | 295.5 | 292.0 | 290.0 | 291.0 |

Time
